# Supplementary material
Source: PubMed Central journal article supplement (PMC3051806)

Hydrogen peroxide inactivates the *Escherichia coli* Isc iron-sulfur assembly system, and OxyR induces the Suf system to compensate.

Soojin Jang# and James A. Imlay\*

Key words: Iron-sulfur clusters, the Suf system, the Isc system, and oxidative stress

Department of Microbiology, University of Illinois, Urbana, IL 61801

\*Corresponding author: (217)-333-5812; fax 217-244-6697; [jimlay@uiuc.edu](mailto:jimlay@uiuc.edu)

#Current address: Department of Medical Microbiology, Washington University School of Medicine, St. Louis, MO 63110.

## Supplementary figures.

### **S1. The Isc system is the major iron-sulfur cluster assembly system during normal growth.**

NADH dehydrogenase I is induced when anaerobic cultures are aerated. Activities were measured at intervals after the aeration (at time zero) of wild-type,  $\Delta hscA$ , and  $\Delta suf$  cultures. Note that NADH dehydrogenase I is synthesized in strains lacking the Suf system ( $\Delta suf$ ) but not in strains lacking the Isc system ( $\Delta hscA$ )

**S2. The *suf* operon is induced by sub-micromolar H<sub>2</sub>O<sub>2</sub>.** Expression after aeration of a transcriptional *lacZ* fusion placed behind the *suf* promoters. Concurrent measurements showed that the H<sub>2</sub>O<sub>2</sub> level rose from 0.2 to 0.7 micromolar over the course of this experiment. The specific activity reached only 0.27 in a strain that lacked the OxyR binding site upstream of the *suf* promoter (Fig. 8A).

**S3. OxyR is required to induce the Suf system at the sufficient level.** Anaerobic Hpx<sup>-</sup> Suf<sup>+</sup>, Hpx<sup>-</sup> *suf*<sup>NI</sup>, and Hpx<sup>-</sup> Suf<sup>-</sup> cells were diluted into aerobic glucose medium with 6 μM H<sub>2</sub>O<sub>2</sub>. The *suf*<sup>NI</sup> allele lacks the OxyR binding site.

**S4. The inactivation of the Isc system is not due to damage to ferredoxin by H<sub>2</sub>O<sub>2</sub>.** (A) Hpx<sup>-</sup> cells that overproduce Fdx were harvested anaerobically, concentrated, and then exposed to 0, 10, or 100 μM H<sub>2</sub>O<sub>2</sub>. Catalase and dithionite were then added to reduce the iron-sulfur cluster to an EPR-visible species. The EPR spectrum of purified Fdx (top) is shown as a control. No significant EPR signal was visible in control strains lacking the *fdx* plasmid (not shown). Note that prior H<sub>2</sub>O<sub>2</sub> exposure does not diminish the EPR signal. (B) NADH dehydrogenase I is induced when anaerobic cultures are aerated. Activities were measured at intervals after the aeration of the cultures that were grown in lactose medium. Two independent cultures of Hpx<sup>-</sup>

*Δsuf* containing pFdx are presented.

**S5. EPR analysis was not able to detect damage to iron-sulfur clusters in the Isc system**

**during H<sub>2</sub>O<sub>2</sub> stress.** (A) Hpx<sup>-</sup> cells that overproduce the Isc system were harvested anaerobically, concentrated, and then exposed to the indicated concentrations of H<sub>2</sub>O<sub>2</sub>. Note that H<sub>2</sub>O<sub>2</sub> does not generate any [3Fe-4S]<sup>+</sup> signal. (B) EPR analysis was also performed after the H<sub>2</sub>O<sub>2</sub>-exposed cells were treated with catalase and 10 mM dithionite. Prior H<sub>2</sub>O<sub>2</sub> treatment did not diminish the EPR signals arising from the reduced Isc protein clusters.

**S6. Apo-IscR was accumulated during superoxide stress resulting in the induction of the Suf**

**system.** Expression after aeration of transcriptional *lacZ* fusion placed behind either the *suf* promoter (*Psuf*) or the *suf*<sup>NI</sup> promoter that lacks the OxyR binding site (*Psuf*<sup>NI</sup>). The Suf induction was mediated by apo-IscR not by OxyR. No significant induction of the Suf system was detected in SOD<sup>+</sup> cells at comparable cell densities (not shown).

## S1

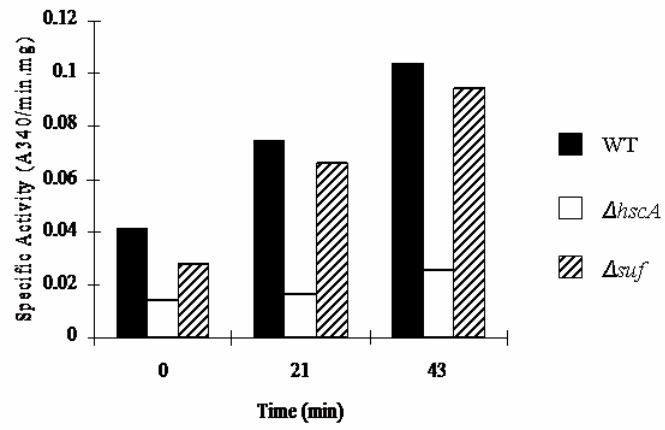

## S2

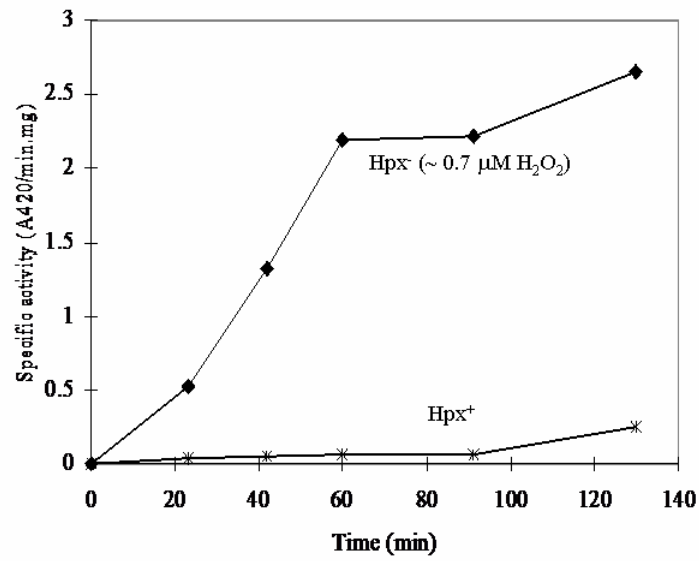

### S3

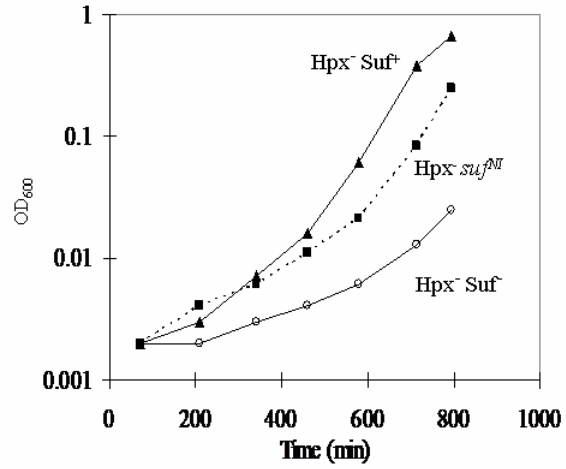

### S4

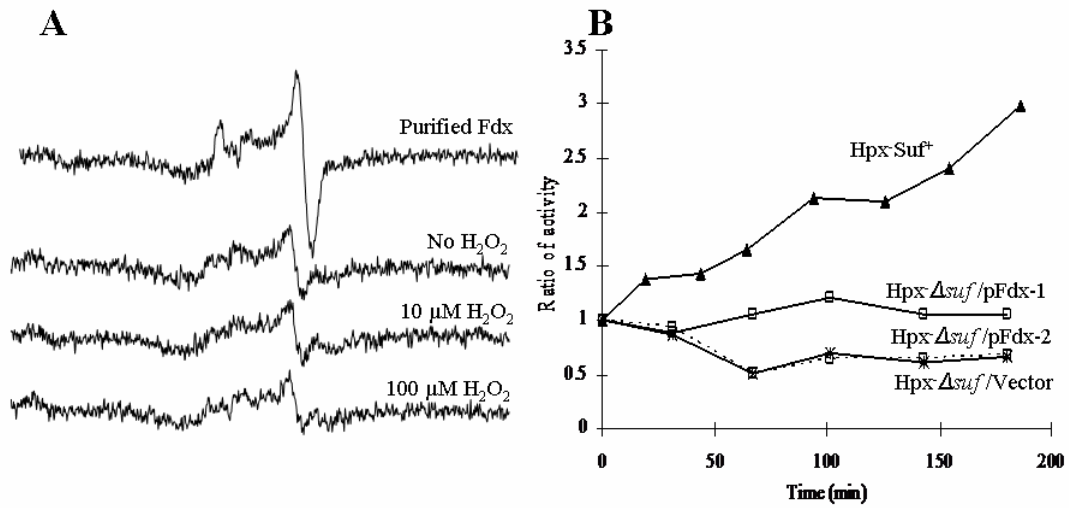

# S5

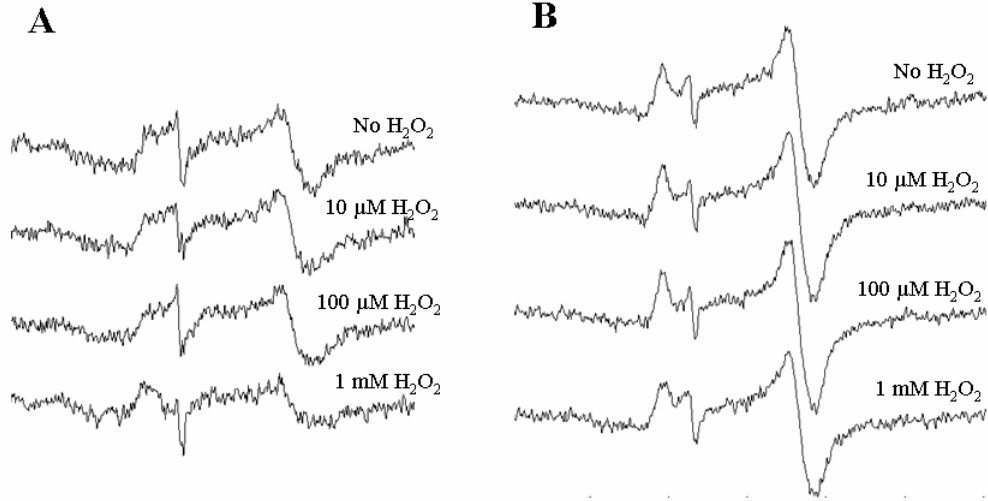

# S6

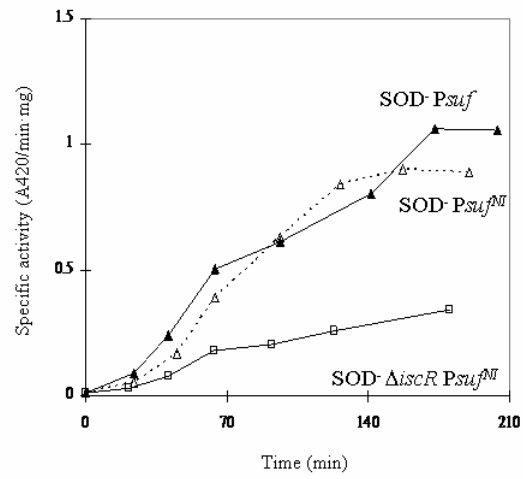

Supplement: NIHMS274991-supplement-Supplementary_data.pdf [file NIHMS274991-supplement-Supplementary_data.pdf]
